# Supplementary material for: Graphene-based microfluidic perforated microelectrode arrays for retinal electrophysiological studies
Source: Royal Society of Chemistry journal article supplement (doi:10.1039/d3lc00064h), 2023-01-01
Supplement: d3lc00064h1.pdf [file d3lc00064h1.pdf]

Graphene-based microfluidic perforated microelectrode arrays for retinal electrophysiological  
studies

Alberto Esteban-Linares,<sup>a,‡</sup> Xiaosi Zhang,<sup>b,‡</sup> Hannah H. Lee,<sup>c</sup> Michael L. Risner,<sup>c</sup> Sharon M.  
Weiss,<sup>b,d</sup> Ya-Qiong Xu,<sup>b,d</sup> Edward Levine,<sup>c,e,\*</sup> and Deyu Li<sup>a,\*</sup>

<sup>a</sup>*Department of Mechanical Engineering, Vanderbilt University, Nashville, TN, 37235, United States*

<sup>b</sup>*Department of Electrical and Computer Engineering, Vanderbilt University, Nashville, TN 37235, United States*

<sup>c</sup>*Department of Ophthalmology and Visual Sciences, Vanderbilt Eye Institute, Vanderbilt University Medical Center, Nashville, TN, 37232, United States*

<sup>d</sup>*Department of Physics and Astronomy, Vanderbilt University, Nashville, TN, 37235, United States*

<sup>e</sup>*Department of Cell and Developmental Biology, Vanderbilt University, Nashville, TN 37235, United States*

<sup>‡</sup>These authors contributed equally to this work.

\*Corresponding authors: [ed.levine@vumc.org](mailto:ed.levine@vumc.org); [deyu.li@vanderbilt.edu](mailto:deyu.li@vanderbilt.edu)

## Table of Contents

|                                                                                                                           |     |
|---------------------------------------------------------------------------------------------------------------------------|-----|
| Figure S1: Optical images of the $\mu$ pMEA platform.....                                                                 | S-3 |
| Figure S2: COMSOL Multiphysics Simulation.....                                                                            | S-4 |
| Figure S3: Firing activities of three different types of RGCs upon light stimulation.....                                 | S-4 |
| Figure S4: Schematic of the experimental design used for the retina pharmacology experiments.....                         | S-5 |
| Figure S5: Responses of electrodes located away from delivery channel upon locally delivered 22 mM $K^+$ stimulation..... | S-5 |
| Figure S6: Time Analysis.....                                                                                             | S-6 |

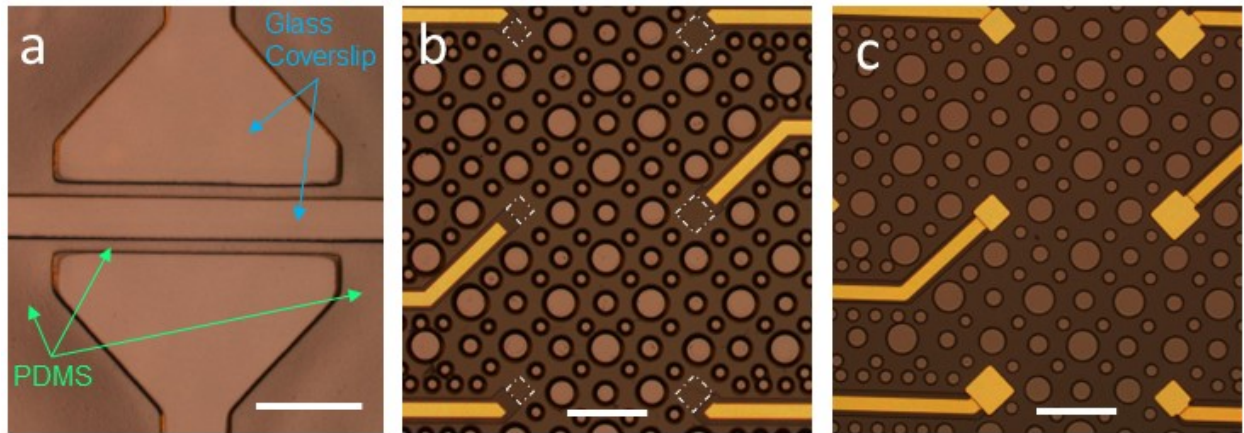

**Supplemental Figure 1:** Optical images of the  $\mu$ MEA platform. **(a)** Open Channel PDMS Layer. PDMS structures (green arrows) on a glass coverslip outline the microfluidic channel and chambers. **(b)** The PI layer with through-holes with the graphene electrodes indicated by white dashed boxes. **(c)** An optical image of the microfabricated PI layer with through-holes and Ti/Au electrodes. Scale bars in **(a)**, **(b)**, and **(c)** are 500, 100, and 100  $\mu\text{m}$ , respectively.

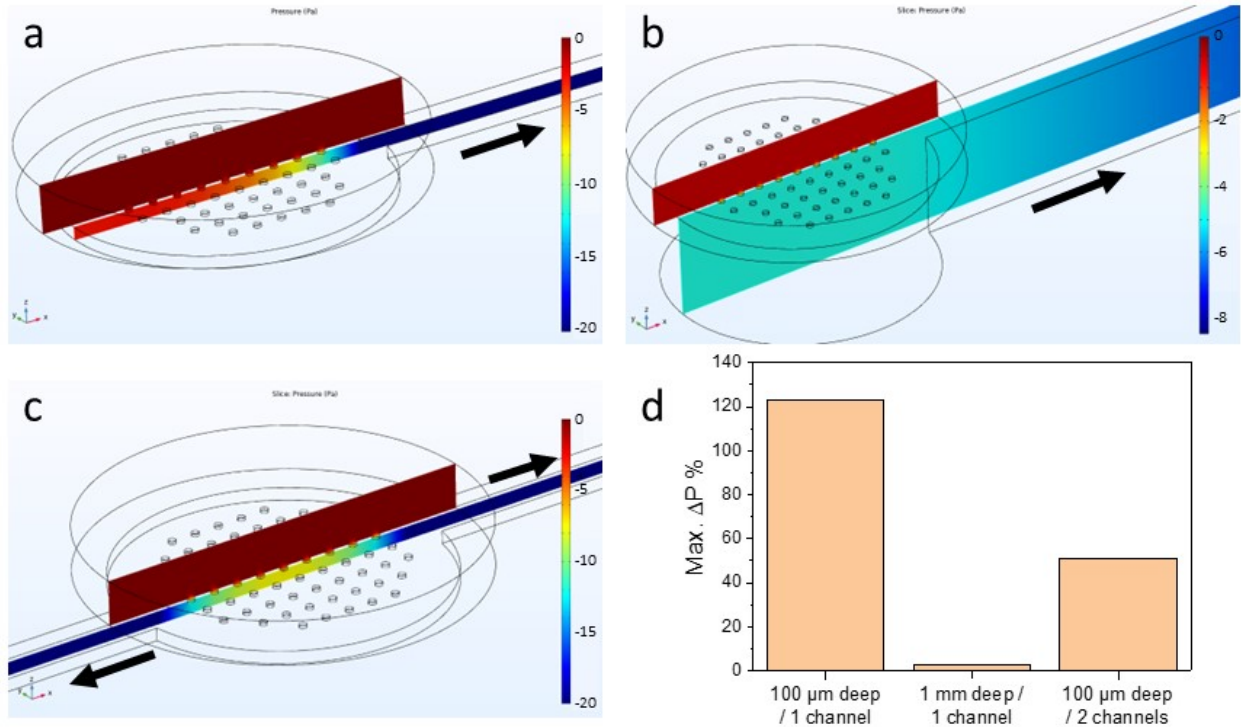

**Supplemental Figure 2:** COMSOL Multiphysics simulation. Results of three-dimensional computational fluid dynamics model for understanding pressure distribution across the through-holes in three different configurations: one 100 μm deep suction channel (a), one 1 mm deep suction channel (b), and two 100 μm deep suction channels (c). The plot depicts the pressure distribution along a y-axis slice at the center of the channel and chamber. (d) Statistical analysis results of the pressure distribution across the through-holes in three different configurations, showing a maximum percentage difference in pressure between the holes experiencing the highest and lowest negative pressure of 122%, 3%, and 55%, respectively.

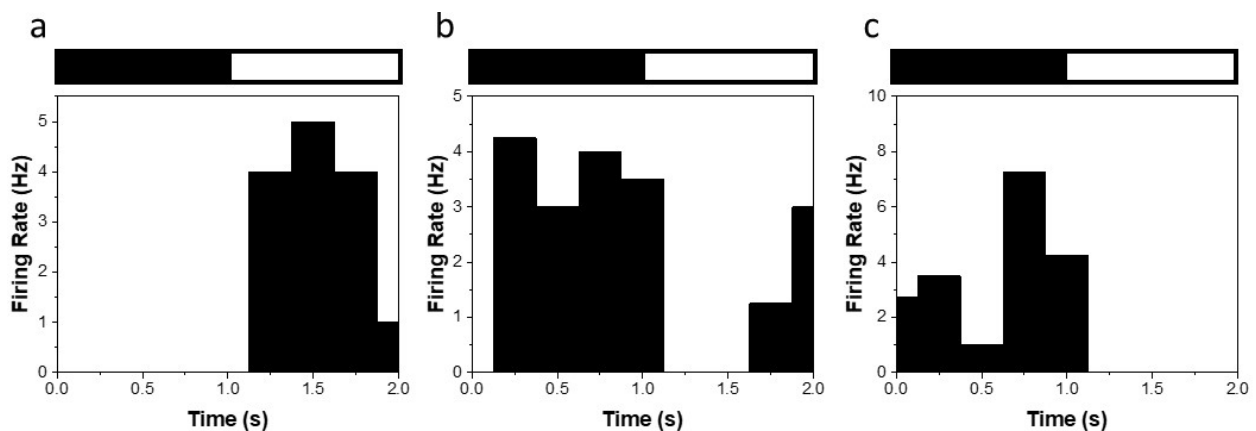

**Supplemental Figure 3:** Firing activities of three different types of RGCs upon light stimulation: ON Type (a), ON-OFF Type (b), and OFF Type (c) in response to the same light stimulus. Bars above the plots indicate the light OFF (black) and ON (white).

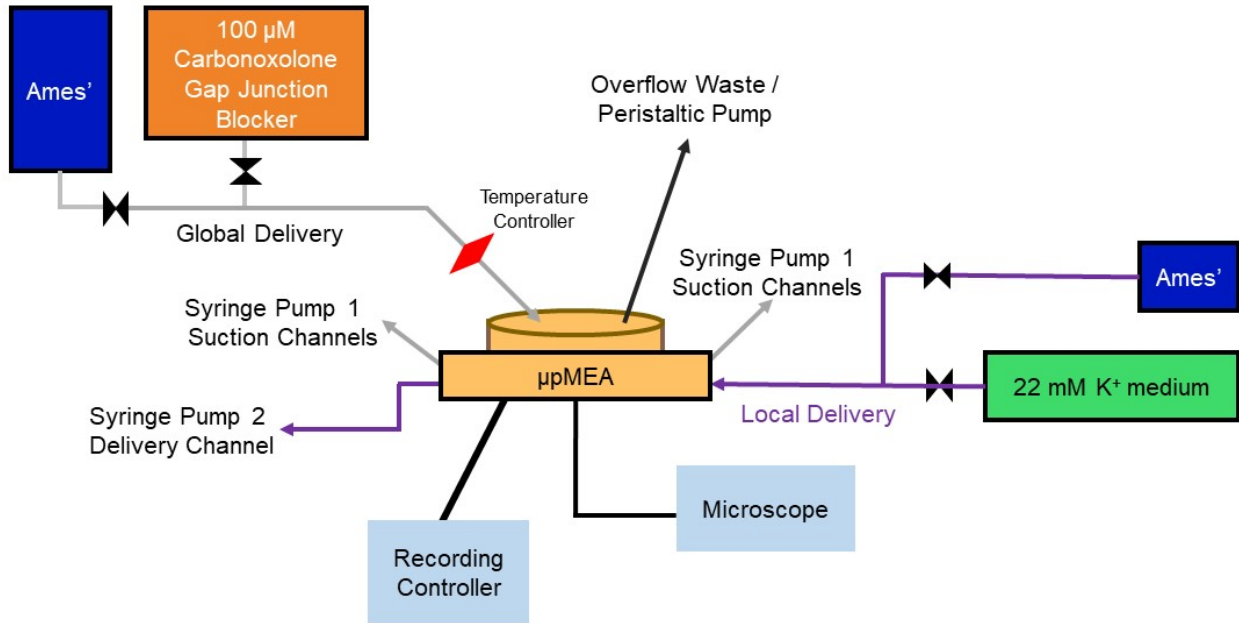

**Supplemental Figure 4:** Schematic of the experimental design used for the retina pharmacology experiments.

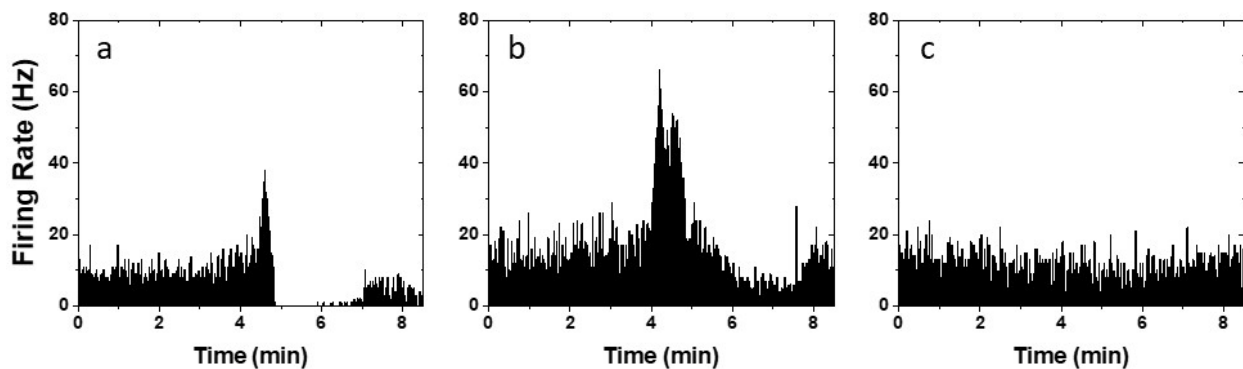

**Supplemental Figure 5:** Responses of electrodes located away from delivery channel upon locally delivered 22 mM K<sup>+</sup> stimulation. The responses can be categorized as strong (a), mild (b) and weak (c), based on their degree of similarity to standard activity upon high K<sup>+</sup> stimulation (Figure 5c).

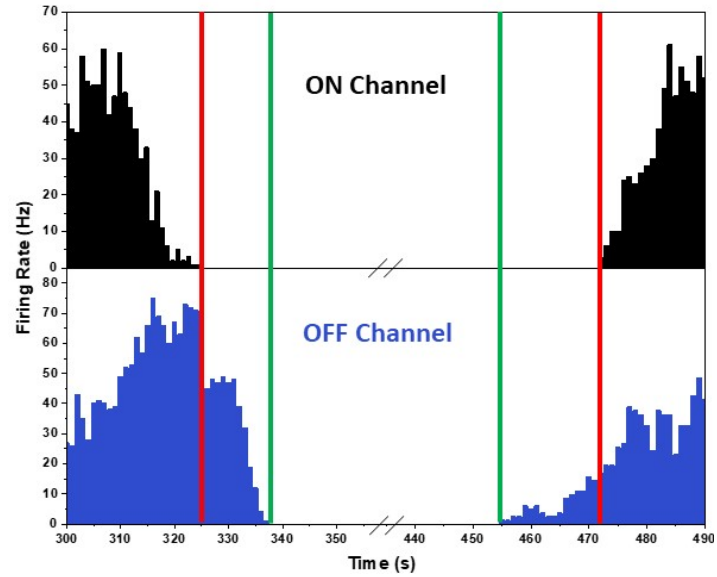

**Supplemental Figure 6:** Time analysis. Comparison of response to locally delivered  $K^+$  stimulation from electrode located ON (positioned on) and OFF ( $160 \mu\text{m}$  away from) the delivery channel. Neuronal depolarization block occurs 12.5 s earlier in the ON channel electrode, whereas the reappearance of firing activity takes place 17 s later. The red and green lines depict the cessation and recovery of action potentials from the electrodes located on and off the delivery channel, respectively.
